# Supplementary material for: Distribution of Mixotrophy and Desiccation Survival Mechanisms across Microbial Genomes in an Arid Biological Soil Crust Community
Source: PubMed Central journal article supplement (PMC7901476; doi:10.1128/msystems.00786-20), 2021-01-12
Supplement: mSystems.00786-20-st002.pdf [file mSystems.00786-20-st002.pdf]

**Table S2A: Metagenomic sequencing efforts and representation of raw reads in the assemblies and MAGs**

| Sample         | Produced data (Gbp) | Mio. raw read pairs (2x150 bp) | Mio. Error-corrected Read pairs | Nonpareil % of diversity covered | Nonpareil diversity index | Mapping to assembly (with > 95% identity) | Mapping to Final MAGs (with > 95% identity) |
|----------------|---------------------|--------------------------------|---------------------------------|----------------------------------|---------------------------|-------------------------------------------|---------------------------------------------|
| <b>B20</b>     | 28                  | 92                             | 84                              | 74%                              | 20.7                      | 54%                                       | 36%                                         |
| <b>F08</b>     | 32                  | 107                            | 96                              | 67%                              | 21.7                      | 40%                                       | 24%                                         |
| <b>G19</b>     | 28                  | 94                             | 85                              | 65%                              | 21.6                      | 43%                                       | 31%                                         |
| <b>C15-24h</b> | 16                  | 55                             | 52                              | 56%                              | 21.8                      | 34%                                       | 26%                                         |
| <b>F12-24h</b> | 20                  | 68                             | 66                              | 58%                              | 21.9                      | 34%                                       | 24%                                         |

**Table S2B: Initial metagenome assembly metrics**

|                                 | Initial assembly (contigs > 1000 bp) |
|---------------------------------|--------------------------------------|
| <b>Total size (Gbp)</b>         | 1.14                                 |
| <b>Number of contigs</b>        | 431,850                              |
| <b>Largest contig (bp)</b>      | 167,554                              |
| <b>Contig length N50</b>        | 3140                                 |
| <b>Contig length L50</b>        | 89605                                |
| <b>GC content</b>               | 69%                                  |
| <b>Mapping B20 (&gt;95% id)</b> | 54%                                  |
| <b>Mapping F08 (&gt;95% id)</b> | 40%                                  |
| <b>Mapping G19 (&gt;95% id)</b> | 43%                                  |
| <b>Mapping C15 (&gt;95% id)</b> | 34%                                  |
| <b>Mapping F12 (&gt;95% id)</b> | 34%                                  |
